# Supplementary material
Source: Springer Nature journal article supplement (https://www.springermedizin.de/resource/supplementary/12936_2008_718_MOESM3_ESM.pdf/9548084)

# A. 1% PARASITAEMIA

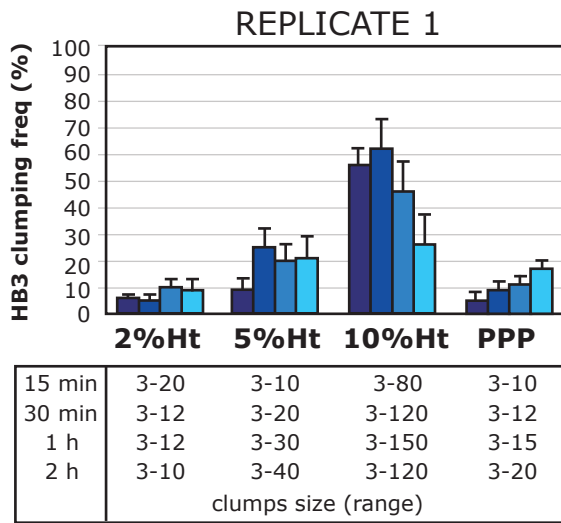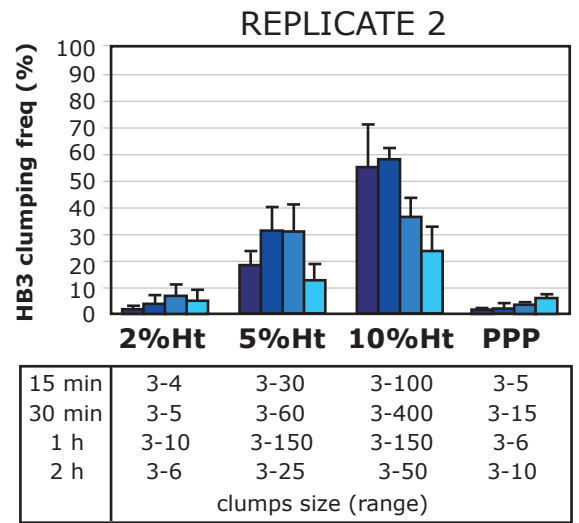

# B. 4% PARASITAEMIA

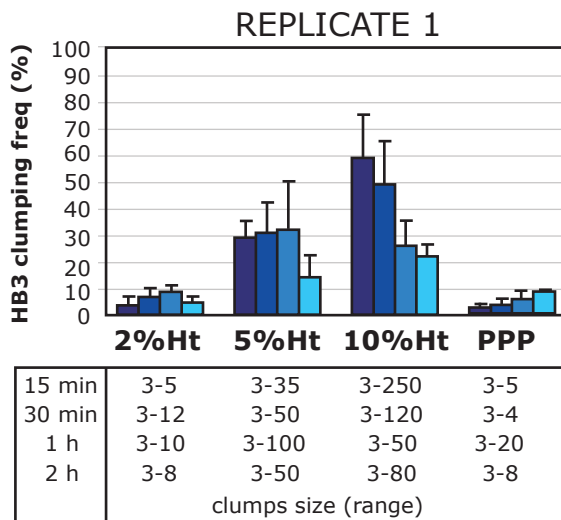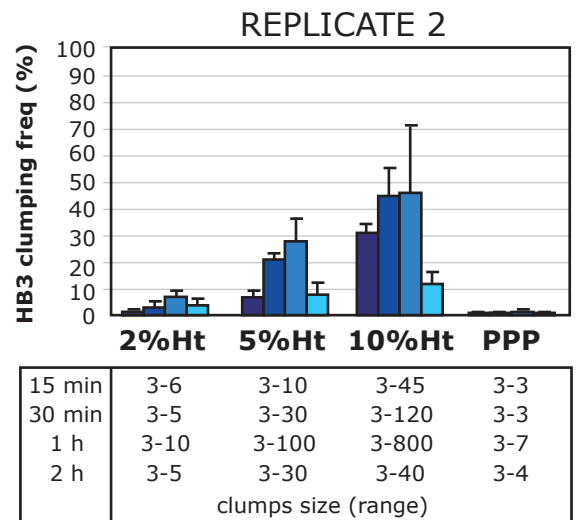

# C. 12% PARASITAEMIA

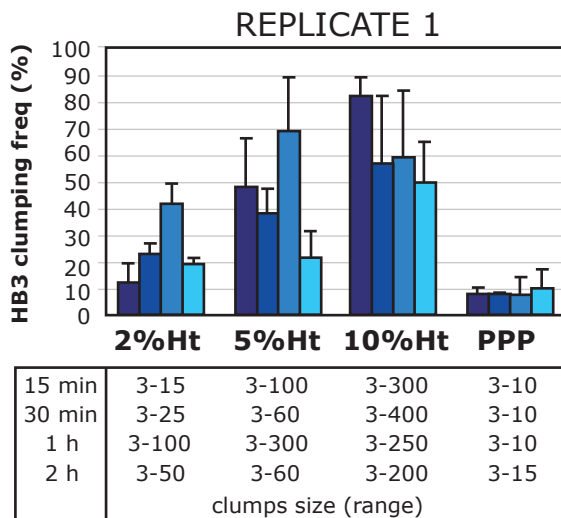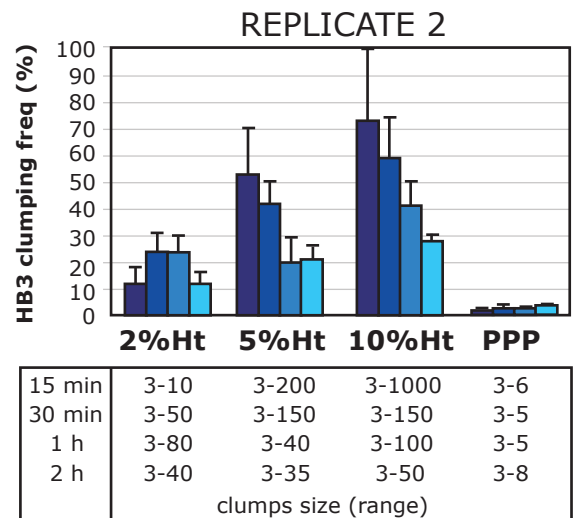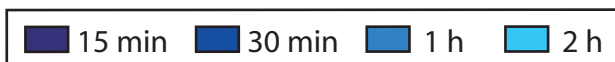

Supplement: MOESM3 [file 9548084]
